# Supplementary material for: Clinical and prognostic value of preoperative hydronephrosis in upper tract urothelial carcinoma: a systematic review and meta-analysis
Source: PeerJ. 2016 Jun 21;4:e2144. doi: 10.7717/peerj.2144 (PMC4924132; doi:10.7717/peerj.2144)
Supplement: Table S5 [file peerj-04-2144-s008.xlsx]

## Sheet: Sheet1
Study	logHR	SE
Bozzini_2013	0.174	0.4127
Chung_2014	0.9555	0.4626
Liang_2016	0.5371	0.3197
Ng_2011	2.4931	1.1489
Sakano_2013	0.1823	0.1759
Xing_2016	0.5481	0.3507
Yeh_2015-1	0.131	0.2416
Yeh_2015-2	0.6281	0.2995
Zhang_2013	1.6677	0.5068
Zhang_2015	0.6575	0.2056
Zhang_2016	-0.045	0.3236
Zou_2014	0.8671	1.7487
